# Supplementary material
Source: publisher figshare collection journal article supplement (https://asha.figshare.com/articles/dataset/_/24101667)
Supplement: Supplementary file 1 [file 1]

**Supplemental Material S2.** Subgroup regression analyses: NZSS score outcomes - physiological measures across diagnostic groups and acuity (ICU, intubation, tracheostomy).

**NZSS score outcomes – physiological measures by diagnostic groups**  
*p\*\* significant ( $p < .05$ ) correlations shown*

| Physiological Measures    | Outcome    | Diagnosis    | B (95% CI)           | p           |
|---------------------------|------------|--------------|----------------------|-------------|
| Urge to clear             | NZSS total | Neuro        | 0.04 (-0.14, 0.21)   | .688        |
| Urge to clear             | NZSS total | Structural   | 0.11 (-0.18, 0.39)   | .458        |
| Urge to clear             | NZSS total | Critical/ICU | 0.17 (-0.10, 0.45)   | .208        |
| Urge to clear             | NZSS total | Other        | 0.11 (-0.21, 0.43)   | .490        |
|                           |            |              |                      |             |
| Peak expiratory force     | NZSS total | Neuro        | -0.07 (-0.29, 0.15)  | .550        |
| Peak expiratory force     | NZSS total | Structural   | -0.17 (-0.58, 0.25)  | .419        |
| Peak expiratory force     | NZSS total | Critical/ICU | -0.36 (-0.89, 0.17)  | .179        |
| Peak expiratory force     | NZSS total | Other        | 0.17 (-0.32, 0.66)   | .493        |
|                           |            |              |                      |             |
| Swallow/min               | NZSS total | Neuro        | -1.14 (-2.44, 0.16)  | .086        |
| Swallow/min               | NZSS total | Structural   | -2.69 (-4.63, -0.75) | <b>.007</b> |
| Swallow/min               | NZSS total | Critical/ICU | -0.02 (-1.83, 1.78)  | .979        |
| Swallow/min               | NZSS total | Other        | -1.45 (-3.24, 0.34)  | .108        |
|                           |            |              |                      |             |
| Laryngeal adductor reflex | NZSS total | Neuro        | -1.01 (-2.09, 0.07)  | .067        |
| Laryngeal adductor reflex | NZSS total | Structural   | -1.45 (-2.89, -0.01) | .048        |
| Laryngeal adductor reflex | NZSS total | Critical/ICU | -0.65 (-2.13, 0.82)  | .374        |
| Laryngeal adductor reflex | NZSS total | Other        | -1.71 (-3.81, 0.38)  | .104        |
|                           |            |              |                      |             |
| Pharyngeal squeeze        | NZSS total | Neuro        | -1.65 (-2.60, -0.71) | <b>.001</b> |
| Pharyngeal squeeze        | NZSS total | Structural   | -0.95 (-2.50, 0.60)  | .224        |
| Pharyngeal squeeze        | NZSS total | Critical/ICU | -1.59 (-3.02, -0.16) | .030        |
| Pharyngeal squeeze        | NZSS total | Other        | -1.95 (-3.44, -0.46) | .012        |
|                           |            |              |                      |             |
| Vocal fold paralysis      | NZSS total | Neuro        | 0.89 (-0.06, 1.83)   | .066        |
| Vocal fold paralysis      | NZSS total | Structural   | 1.69 (0.42, 2.97)    | <b>.010</b> |
| Vocal fold paralysis      | NZSS total | Critical/ICU | 1.14 (-0.46, 2.75)   | .159        |
| Vocal fold paralysis      | NZSS total | Other        | 1.00 (-0.77, 2.77)   | .260        |

## NZSS score outcomes – physiological measures by ICU admission

*p\*\* significant ( $p < .05$ ) correlations shown*

| Physiological Measures    | Outcome    | ICU admission | B (95%CI)            | p      | rho   | P**    |
|---------------------------|------------|---------------|----------------------|--------|-------|--------|
| Urge to clear             | NZSS total | No            | 0.01 (-0.16, 0.19)   | .887   |       |        |
| Urge to clear             | NZSS total | Yes           | 0.16 (0.00, 0.33)    | .047   |       |        |
|                           |            |               |                      |        |       |        |
| Peak expiratory force     | NZSS total | No            | -0.13 (-0.34, 0.08)  | .223   |       |        |
| Peak expiratory force     | NZSS total | Yes           | -0.10 (-0.37, 0.16)  | .441   |       |        |
|                           |            |               |                      |        |       |        |
| Swallow/min               | NZSS total | No            | -0.68 (-1.72, 0.36)  | .197   |       |        |
| Swallow/min               | NZSS total | Yes           | -1.77 (-2.99, -0.54) | .005   | -.342 | < .001 |
|                           |            |               |                      |        |       |        |
| Laryngeal adductor reflex | NZSS total | No            | -1.17 (-2.26, -0.09) | .034   |       |        |
| Laryngeal adductor reflex | NZSS total | Yes           | -1.05 (-1.95, -0.16) | .022   | -.219 | .018   |
|                           |            |               |                      |        |       |        |
| Pharyngeal squeeze        | NZSS total | No            | -1.83 (-2.71, -0.96) | < .001 | -.404 | < .001 |
| Pharyngeal squeeze        | NZSS total | Yes           | -1.17 (-2.04, -0.30) | .009   | -.250 | .006   |
|                           |            |               |                      |        |       |        |
| Vocal fold paralysis      | NZSS total | No            | 1.08 (0.14, 2.02)    | .025   | .210  | .028   |
| Vocal fold paralysis      | NZSS total | Yes           | 1.18 (0.33, 2.02)    | .007   | .233  | .006   |

## NZSS score outcomes – physiological measures by Intubation

*p\*\* significant (p < .05) correlations shown*

| Physiological Measures    | Outcome    | Intubation | B (95%CI)            | p      | rho   | P**    |
|---------------------------|------------|------------|----------------------|--------|-------|--------|
| Urge to clear             | NZSS total | No         | 0.02 (-0.14, 0.18)   | .815   |       |        |
| Urge to clear             | NZSS total | Yes        | 0.15 (-0.03, 0.32)   | .096   |       |        |
|                           |            |            |                      |        |       |        |
| Peak expiratory force     | NZSS total | No         | -0.10 (-0.30, 0.10)  | .316   |       |        |
| Peak expiratory force     | NZSS total | Yes        | -0.11 (-0.39, 0.17)  | .450   |       |        |
|                           |            |            |                      |        |       |        |
| Swallow/min               | NZSS total | No         | -0.73 (-1.74, 0.29)  | .160   |       |        |
| Swallow/min               | NZSS total | Yes        | -1.75 (-2.99, -0.51) | .006   | -.338 | < .001 |
|                           |            |            |                      |        |       |        |
| Laryngeal adductor reflex | NZSS total | No         | -1.18 (-2.20, -0.15) | .025   | -.210 | .042   |
| Laryngeal adductor reflex | NZSS total | Yes        | -1.02 (-1.94, -0.10) | .031   | -.216 | .022   |
|                           |            |            |                      |        |       |        |
| Pharyngeal squeeze        | NZSS total | No         | -1.84 (-2.65, -1.02) | < .001 | -.406 | < .001 |
| Pharyngeal squeeze        | NZSS total | Yes        | -1.07 (-1.99, -0.14) | .024   | -.227 | .017   |
|                           |            |            |                      |        |       |        |
| Vocal fold paralysis      | NZSS total | No         | 1.08 (0.19, 1.97)    | .018   | .216  | .019   |
| Vocal fold paralysis      | NZSS total | Yes        | 1.16 (0.29, 2.04)    | .010   | .227  | .009   |

## NZSS score outcomes – physiological measures by Prior tracheostomy.

*p\*\* significant (p < .05) correlations shown*

| Physiological Measures    | Outcome    | Prior tracheotomy | B (95%CI)            | p      | rho   | P**              |
|---------------------------|------------|-------------------|----------------------|--------|-------|------------------|
| Urge to clear             | NZSS total | No                | 0.03 (-0.10, 0.16)   | .674   |       |                  |
| Urge to clear             | NZSS total | Yes               | 0.33 (0.05, 0.61)    | .024   |       |                  |
|                           |            |                   |                      |        |       |                  |
| Peak expiratory force     | NZSS total | No                | -0.04 (-0.21, 0.14)  | .684   |       |                  |
| Peak expiratory force     | NZSS total | Yes               | -0.55 (-1.09, 0.00)  | .048   | -.332 | <b>.044</b>      |
|                           |            |                   |                      |        |       |                  |
| Swallow/min               | NZSS total | No                | -0.81 (-1.66, 0.03)  | .060   | -.215 | <b>.003</b>      |
| Swallow/min               | NZSS total | Yes               | -3.70 (-5.88, -1.52) | .001   | -.473 | <b>&lt; .001</b> |
|                           |            |                   |                      |        |       |                  |
| Laryngeal adductor reflex | NZSS total | No                | -1.32 (-2.04, -0.59) | < .001 | -.265 | <b>&lt; .001</b> |
| Laryngeal adductor reflex | NZSS total | Yes               | -1.03 (-2.76, 0.71)  | .238   |       |                  |
|                           |            |                   |                      |        |       |                  |
| Pharyngeal squeeze        | NZSS total | No                | -1.46 (-2.14, -0.79) | < .001 | -.316 | <b>&lt; .001</b> |
| Pharyngeal squeeze        | NZSS total | Yes               | -1.78 (-3.39, -0.17) | .031   | -.344 | <b>.019</b>      |
|                           |            |                   |                      |        |       |                  |
| Vocal fold paralysis      | NZSS total | No                | 1.13 (0.46, 1.81)    | .001   | .231  | <b>.001</b>      |
| Vocal fold paralysis      | NZSS total | Yes               | 1.36 (-0.20, 2.92)   | .087   |       |                  |
