# Supplementary material
Source: publisher figshare collection journal article supplement (https://asha.figshare.com/articles/dataset/_/24101667)
Supplement: Supplementary file 2 [file 1]

**Supplemental Material S1.** Subgroup regression analysis: Patient Outcomes – FEES findings.

**Patient Outcome: Nasogastric tube duration**

| Risk factor                   | Univariate models |          | Final multivariable model |                                    |
|-------------------------------|-------------------|----------|---------------------------|------------------------------------|
|                               | IRR (95% CI)      | <i>p</i> | IRR (95% CI)              | <i>p</i>                           |
| NZSS total                    | 1.15 (1.06, 1.25) | .001     |                           | <i>R</i> = .31,<br><i>p</i> < .001 |
| Urge to clear                 | 1.00 (0.92, 1.09) | .978     |                           |                                    |
| Peak expiratory force         | 0.85 (0.74, 0.96) | .012     |                           |                                    |
| Swallow/min                   | 0.37 (0.19, 0.72) | .003     |                           |                                    |
| Laryngeal adductor reflex     | 0.74 (0.45, 1.21) | .225     |                           |                                    |
| Pharyngeal squeeze            | 0.69 (0.43, 1.12) | .131     |                           |                                    |
| Vocal fold paralysis          | 1.15 (0.73, 1.81) | .540     |                           |                                    |
| Mucosal changes               | 2.24 (1.48, 3.38) | < .001   | 2.50 (1.45, 4.31)         | .001                               |
| PAS - max                     | 1.10 (1.02, 1.18) | .013     |                           |                                    |
| PAS tsp fluid subscale        | 1.11 (1.04, 1.20) | .003     |                           |                                    |
| PAS continuous fluid subscale | 1.06 (0.99, 1.15) | .117     |                           |                                    |
| PAS puree subscale            | 1.06 (0.92, 1.23) | .400     |                           |                                    |

*Note.* IRR = incidence rate ratio.

## Patient Outcome: IDDS functional score

| Risk Factor:              | Univariate models    |        |                | Final multivariable model |        | rho   | p      |
|---------------------------|----------------------|--------|----------------|---------------------------|--------|-------|--------|
|                           | B (95% CI)           | p      | R <sup>2</sup> | B (95%CI)                 | p      |       |        |
| NZSS total                | -0.28 (-0.44, -0.13) | < .001 | .062           |                           |        | -.207 | .003   |
| Urge to clear             | -0.08 (-0.23, 0.08)  | .324   | .006           |                           |        | -.005 | .951   |
| Peak expiratory force     | 0.34 (0.13, 0.54)    | .001   | .065           |                           |        | .281  | < .001 |
| Swallow/min               | 1.85 (0.81, 2.89)    | .001   | .061           | 1.85 (0.81, 2.89)         | < .001 | .226  | .002   |
| Laryngeal adductor reflex | 0.61 (-0.26, 1.47)   | .169   | .012           |                           |        | .099  | .212   |
| Pharyngeal squeeze        | 2.11 (1.35, 2.88)    | < .001 | .149           | 1.44 (0.73, 2.16)         | < .001 | .333  | < .001 |
| Vocal fold paralysis      | 0.43 (-0.41, 1.27)   | .310   | .005           |                           |        | .063  | .381   |
| Mucosal changes           | -0.02 (-0.81, 0.76)  | .954   | .000           |                           |        | .004  | .959   |
| PAS - max                 | -0.32 (-0.45, -0.18) | < .001 | .102           |                           |        | -.291 | < .001 |
| PAS tsp fluid subscale    | -0.29 (-0.43, -0.16) | < .001 | .085           |                           |        | -.228 | .001   |
| PAS cont. fluid subscale  | -0.26 (-0.40, -0.13) | < .001 | .082           |                           |        | -.257 | < .001 |
| PAS puree subscale        | -0.07 (-0.32, 0.18)  | .575   | .002           |                           |        | -.057 | .438   |

### Patient Outcome: Chest infection

| Risk Factor:              | Univariate models |          | Final multivariable model |                           |
|---------------------------|-------------------|----------|---------------------------|---------------------------|
|                           | OR (95% CI)       | <i>p</i> | OR (95% CI)               | <i>p</i>                  |
| NZSS total                | 1.25 (1.11, 1.40) | < .001   | 1.21 (1.05, 1.40)         | <i>R</i> = .26,<br>< .001 |
| Urge to clear             | 1.13 (1.01, 1.25) | .032     |                           |                           |
| Peak expiratory force     | 0.91 (0.78, 1.06) | .211     |                           |                           |
| Swallow/min               | 0.33 (0.15, 0.76) | .009     | 0.32 (0.12, 0.88)         | .027                      |
| Laryngeal adductor reflex | 0.78 (0.42, 1.43) | .416     |                           |                           |
| Pharyngeal squeeze        | 0.75 (0.43, 1.34) | .334     |                           |                           |
| Vocal fold paralysis      | 0.88 (0.50, 1.56) | .670     |                           |                           |
| Mucosal changes           | 1.53 (0.89, 2.62) | .125     |                           |                           |
| PAS - max                 | 1.08 (0.98, 1.20) | .106     |                           |                           |
| PAS tsp fluid subscale    | 1.08 (0.98, 1.19) | .106     |                           |                           |
| PAS cont. fluid subscale  | 1.10 (0.99, 1.22) | .063     |                           |                           |
| PAS puree subscale        | 1.08 (0.91, 1.28) | .385     |                           |                           |

Note. OR = odds ratio.

**Patient Outcome: Died in admission**

| Risk Factor:              | Univariate models |          | Final multivariable model |                          |
|---------------------------|-------------------|----------|---------------------------|--------------------------|
|                           | OR (95% CI)       | <i>p</i> | OR (95% CI)               | <i>p</i>                 |
| NZSS total                | 1.10 (0.91, 1.32) | .326     |                           | $R = .07$ ,<br>$p = .29$ |
| Urge to clear             | 1.04 (0.86, 1.25) | .696     |                           |                          |
| Peak expiratory force     | 0.88 (0.66, 1.16) | .347     |                           |                          |
| Swallow/min               | 0.41 (0.10, 1.73) | .223     |                           |                          |
| Laryngeal adductor reflex | 0.42 (0.16, 1.08) | .071     |                           |                          |
| Pharyngeal squeeze        | 0.82 (0.31, 2.13) | .680     |                           |                          |
| Vocal fold paralysis      | 1.64 (0.67, 4.05) | .281     |                           |                          |
| Mucosal changes           | 0.44 (0.18, 1.07) | .070     |                           |                          |
| PAS - max                 | 1.08 (0.91, 1.28) | .356     |                           |                          |
| PAS tsp fluid subscale    | 1.12 (0.96, 1.31) | .162     |                           |                          |
| PAS cont. fluid subscale  | 1.17 (0.96, 1.42) | .113     |                           |                          |
| PAS puree subscale        | 1.14 (0.90, 1.44) | .273     |                           |                          |

Note. OR = odds ratio.

### Patient Outcome: Discharged with nasogastric tube

| Risk Factor:              | Univariate models |          | Final multivariable model |                                    |
|---------------------------|-------------------|----------|---------------------------|------------------------------------|
|                           | OR (95% CI)       | <i>p</i> | OR (95% CI)               | <i>p</i>                           |
| NZSS total                | 1.22 (1.07, 1.39) | .004     |                           | <i>R</i> = .20,<br><i>p</i> = .003 |
| Urge to clear             | 1.05 (0.93, 1.18) | .452     |                           |                                    |
| Peak expiratory force     | 0.80 (0.66, 0.98) | .031     |                           |                                    |
| Swallow/min               | 0.12 (0.04, 0.36) | < .001   | 0.13 (0.04, 0.40)         | < .001                             |
| Laryngeal adductor reflex | 0.56 (0.28, 1.10) | .090     |                           |                                    |
| Pharyngeal squeeze        | 0.32 (0.16, 0.66) | .002     |                           |                                    |
| Vocal fold paralysis      | 0.70 (0.35, 1.39) | .302     |                           |                                    |
| Mucosal changes           | 2.64 (1.34, 5.21) | .005     | 2.77 (1.35, 5.68)         | .005                               |
| PAS - max                 | 1.23 (1.08, 1.39) | .001     |                           |                                    |
| PAS tsp fluid subscale    | 1.26 (1.13, 1.41) | < .001   |                           |                                    |
| PAS cont. fluid subscale  | 1.16 (1.02, 1.32) | .022     |                           |                                    |
| PAS puree subscale        | 1.21 (1.00, 1.45) | .046     |                           |                                    |

Note. OR = odds ratio.
